# Supplementary material for: Contrasting Community Composition and Co-Occurrence Relationships of the Active Pico-Sized Haptophytes in the Surface and Subsurface Chlorophyll Maximum Layers of the Arctic Ocean in Summer
Source: MDPI journal article supplement (doi:10.3390/microorganisms10020248), 2022-01-23
Supplement: s1 [file s1]

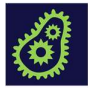

Supplementary Material

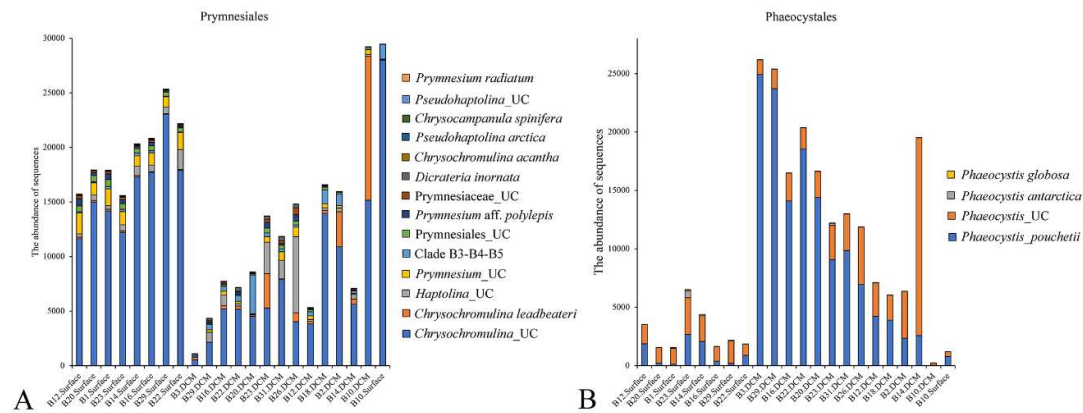

Figure S1. Taxonomic compositions of Prymnesiales (A) and Phaeocystales (B).

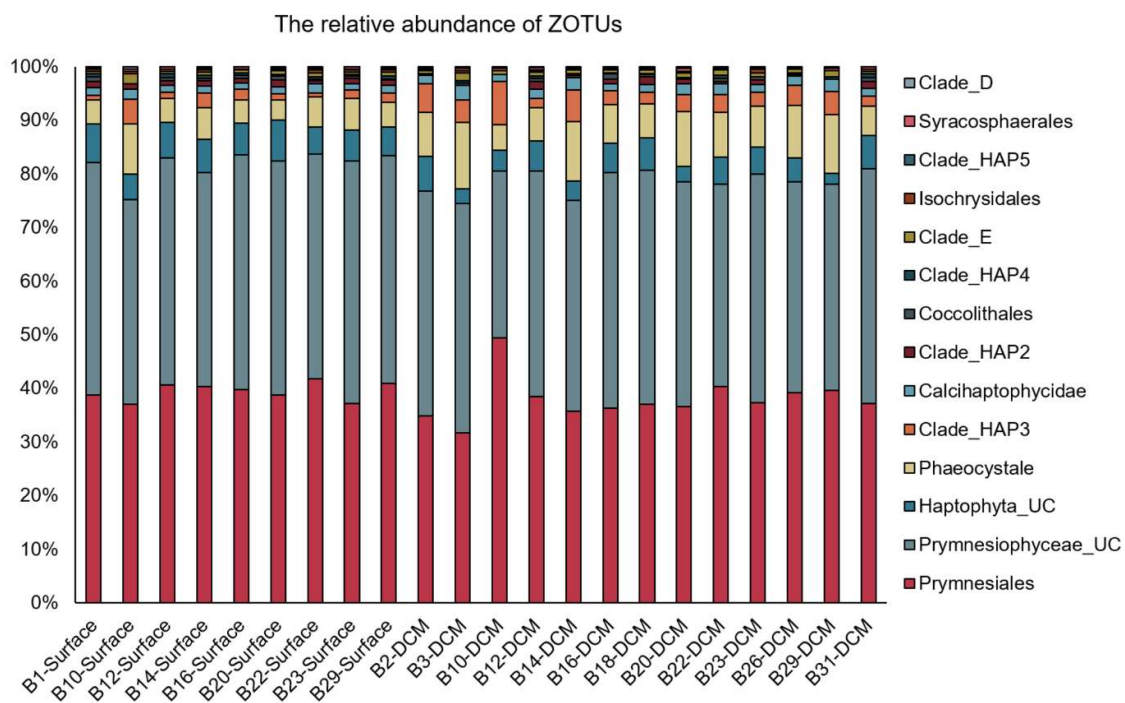

Figure S2. The proportions of ZOTUs.

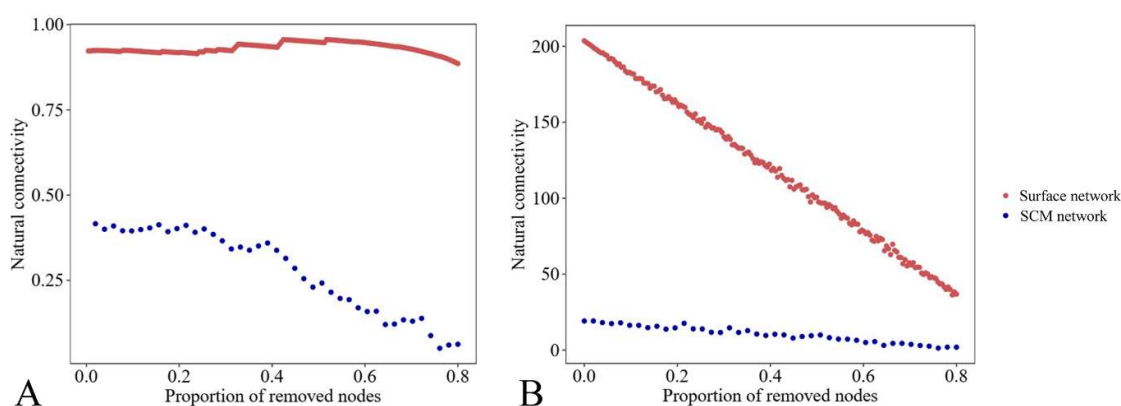

**Figure S3.** Network stability was measured for surface water and SCM layer pico-haptophyte communities using a network attacking scenario in which nodes were gradually removed in a predetermined order (A) or randomly (B).

**Table S1.** Sample Information: SCM—subsurface chlorophyll maximum layer.

| Sample ID   | Station | Latitude | Longitude | Depth (m) |
|-------------|---------|----------|-----------|-----------|
| B1-Surface  | B1      | 65.1735  | -168.6907 | 0         |
| B2-SCM      | B2      | 66.6299  | -168.6875 | 15        |
| B3-SCM      | B3      | 67.6700  | -168.9600 | 25        |
| B10-Surface | B10     | 70.5000  | -168.6667 | 0         |
| B10-SCM     |         |          |           | 25        |
| B12-Surface | B12     | 72.3600  | -168.6667 | 0         |
| B12-SCM     |         |          |           | 35        |
| B14-Surface | B14     | 74.8006  | -167.8983 | 0         |
| B14-SCM     |         |          |           | 32        |
| B16-Surface | B16     | 75.1500  | -176.0000 | 0         |
| B16-SCM     |         |          |           | 50        |
| B18-SCM     | B18     | 75.7669  | 177.0685  | 37        |
| B20-Surface | B20     | 77.0000  | 176.5700  | 0         |
| B20-SCM     |         |          |           | 27        |
| B22-Surface | B22     | 78.5218  | 178.8452  | 0         |
| B22-SCM     |         |          |           | 35        |
| B23-Surface | B23     | 77.8664  | -175.9087 | 0         |
| B23-SCM     |         |          |           | 44        |
| B26-SCM     | B26     | 76.0000  | -170.5000 | 55        |
| B29-Surface | B29     | 77.4723  | -164.1180 | 0         |
| B29-SCM     |         |          |           | 62        |
| B31-SCM     | B31     | 75.6912  | -166.6382 | 44        |

**Table S2.** Environmental parameters at the sampling stations.

| Sample ID   | T (°C) | S    | Nutrients (μM)  |                                  |                 |                  |       | Chl <i>a</i> (μg/L) |         |        | Bacteria (cells/mL) | PPEs (cells/mL) |
|-------------|--------|------|-----------------|----------------------------------|-----------------|------------------|-------|---------------------|---------|--------|---------------------|-----------------|
|             |        |      | PO <sub>4</sub> | NO <sub>2</sub> +NO <sub>3</sub> | NH <sub>4</sub> | SiO <sub>4</sub> | Total | > 20 μm             | 2-20 μm | < 2 μm |                     |                 |
| B1-Surface  | 9.40   | 31.0 | 0.25            | 0.00                             | 0.00            | 3.08             | 0.50  | 0.19                | 0.22    | 0.09   | 1.28E+06            | 1.46E+04        |
| B10-Surface | 6.51   | 31.2 | 0.24            | 0.00                             | 0.00            | 1.00             | 0.10  | 0.22                | 0.15    | 0.13   | 1.78E+05            | 3.39E+03        |
| B12-Surface | -0.74  | 28.5 | 0.54            | 0.00                             | 0.00            | 9.48             | 0.28  | 0.36                | 0.05    | 0.09   | 8.16E+05            | 3.28E+03        |

|             |       |      |      |      |      |       |      |      |      |      |          |          |
|-------------|-------|------|------|------|------|-------|------|------|------|------|----------|----------|
| B14-Surface | -1.09 | 27.5 | 0.55 | 0.00 | 0.00 | 1.52  | 0.09 | 0.10 | 0.22 | 0.18 | 2.47E+05 | 3.32E+03 |
| B16-Surface | -1.14 | 28.2 | 0.63 | 0.00 | 0.00 | 0.49  | 0.07 | 0.13 | 0.21 | 0.15 | 2.03E+05 | 1.79E+03 |
| B20-Surface | -1.51 | 30.0 | 0.61 | 0.00 | 0.00 | 0.00  | 0.40 | 0.09 | 0.33 | 0.07 | 2.24E+05 | 4.81E+03 |
| B22-Surface | -1.45 | 29.2 | 0.46 | 0.00 | 0.00 | 0.66  | 0.08 | 0.14 | 0.23 | 0.13 | 2.20E+05 | 1.40E+03 |
| B23-Surface | -1.34 | 28.4 | 0.61 | 0.00 | 0.00 | 1.38  | 0.06 | 0.11 | 0.22 | 0.17 | 2.22E+05 | 1.10E+03 |
| B29-Surface | -1.25 | 27.4 | 0.55 | 0.03 | 0.00 | 2.04  | 0.05 | 0.07 | 0.24 | 0.19 | 1.69E+05 | 1.26E+03 |
| B2-SCM      | 2.96  | 31.8 | 0.87 | 1.05 | 1.54 | 12.38 | 0.52 | 0.24 | 0.15 | 0.11 | 8.55E+05 | 4.07E+03 |
| B3-SCM      | 2.06  | 32.2 | 0.84 | 1.71 | 0.21 | 10.88 | 6.66 | 0.45 | 0.04 | 0.01 | 4.62E+05 | 7.89E+03 |
| B10-SCM     | 2.41  | 32.1 | 0.84 | 0.70 | 0.47 | 9.05  | 0.68 | 0.34 | 0.10 | 0.05 | 1.28E+05 | 2.12E+03 |
| B12-SCM     | -1.17 | 32.4 | 2.01 | 8.22 | 4.03 | 23.74 | 2.14 | 0.42 | 0.07 | 0.01 | 1.01E+06 | 4.66E+03 |
| B14-SCM     | -0.88 | 30.7 | 1.00 | 3.18 | 0.00 | 7.65  | 0.43 | 0.07 | 0.18 | 0.25 | 3.42E+05 | 4.92E+03 |
| B16-SCM     | -1.45 | 31.7 | 1.12 | 5.75 | 0.17 | 11.04 | 1.89 | 0.37 | 0.08 | 0.05 | 1.86E+05 | 5.03E+03 |
| B18-SCM     | -1.48 | 31.7 | 1.29 | 3.97 | 0.00 | 9.65  | 1.07 | 0.40 | 0.08 | 0.01 | 2.17E+05 | 4.36E+03 |
| B20-SCM     | -1.58 | 31.7 | 1.08 | 4.84 | 0.00 | 14.72 | 0.74 | 0.36 | 0.08 | 0.06 | 1.49E+05 | 3.56E+03 |
| B22-SCM     | -0.80 | 31.5 | 0.83 | 2.96 | 0.00 | 8.39  | 1.24 | 0.36 | 0.09 | 0.06 | 2.35E+05 | 5.72E+03 |
| B23-SCM     | -0.21 | 31.1 | 0.71 | 1.01 | 0.00 | 2.55  | 1.07 | 0.29 | 0.09 | 0.12 | 4.03E+05 | 7.46E+03 |
| B26-SCM     | -0.35 | 31.0 | 0.74 | 1.01 | 0.00 | 4.00  | 0.66 | 0.14 | 0.12 | 0.24 | 3.35E+05 | 6.90E+03 |
| B29-SCM     | 0.17  | 30.9 | 0.83 | 1.37 | 0.00 | 5.91  | 0.43 | 0.05 | 0.12 | 0.33 | 1.89E+05 | 7.93E+03 |
| B31-SCM     | -1.16 | 30.9 | 1.06 | 2.98 | 0.00 | 7.31  | 0.42 | 0.16 | 0.17 | 0.17 | 2.62E+05 | 4.12E+03 |

**Table S3.** Alpha diversity estimates of the samples collected. \*Reads before randomly subsampling of 35,677 sequences without replacement.

| Sample      | Reads* | ZOTU* | ZOTUs | Coverage | Shannon | PD   |
|-------------|--------|-------|-------|----------|---------|------|
| B1-Surface  | 46710  | 785   | 750   | 0.9967   | 4.82    | 8.00 |
| B10-Surface | 77767  | 264   | 198   | 0.9982   | 2.67    | 3.34 |
| B12-Surface | 64681  | 788   | 741   | 0.9977   | 0.88    | 7.97 |
| B14-Surface | 35677  | 610   | 610   | 0.9962   | 3.46    | 7.02 |
| B16-Surface | 65324  | 782   | 719   | 0.9968   | 4.81    | 7.91 |
| B20-Surface | 60491  | 755   | 703   | 0.9967   | 2.52    | 7.69 |
| B22-Surface | 73268  | 682   | 590   | 0.9962   | 3.99    | 6.84 |
| B23-Surface | 49330  | 788   | 742   | 0.9962   | 3.16    | 7.99 |
| B29-Surface | 65416  | 648   | 579   | 0.9966   | 4.45    | 6.69 |
| B2-SCM      | 106031 | 500   | 363   | 0.9964   | 3.91    | 4.88 |
| B3-SCM      | 96255  | 402   | 275   | 0.9970   | 3.62    | 4.34 |
| B10-SCM     | 121493 | 319   | 213   | 0.9969   | 2.64    | 3.20 |
| B12-SCM     | 58364  | 632   | 544   | 0.9970   | 4.6     | 6.56 |
| B14-SCM     | 111701 | 419   | 296   | 0.9960   | 2.35    | 4.27 |
| B16-SCM     | 102869 | 711   | 596   | 0.9957   | 3.78    | 7.01 |
| B18-SCM     | 102190 | 753   | 616   | 0.9955   | 3.58    | 7.46 |
| B20-SCM     | 104469 | 480   | 335   | 0.9972   | 4.78    | 4.93 |
| B22-SCM     | 113514 | 579   | 415   | 0.9966   | 3.17    | 6.03 |
| B23-SCM     | 114902 | 765   | 613   | 0.9978   | 1.53    | 7.20 |
| B26-SCM     | 103266 | 496   | 360   | 0.9967   | 3.45    | 5.07 |
| B29-SCM     | 90575  | 316   | 223   | 0.9970   | 1.27    | 3.30 |
| B31-SCM     | 81608  | 813   | 720   | 0.9962   | 3.91    | 7.82 |

**Table S4.** Spearman correlations between environmental factors and alpha diversity estimates of pico-sized haptophytes revealed by the SSU rRNA.

|                                  | ZOTU Richness |              | PD            |              | Shannon       |              |
|----------------------------------|---------------|--------------|---------------|--------------|---------------|--------------|
|                                  | r             | p            | r             | p            | r             | p            |
| Latitude                         | 0.141         | 0.530        | 0.148         | 0.512        | -0.013        | 0.954        |
| Longitude                        | -0.155        | 0.490        | -0.176        | 0.432        | -0.128        | 0.570        |
| Depth                            | -0.403        | 0.063        | <b>-0.433</b> | <b>0.044</b> | <b>-0.505</b> | <b>0.017</b> |
| Temperature                      | -0.331        | 0.132        | -0.343        | 0.118        | -0.249        | 0.264        |
| Salinity                         | <b>-0.480</b> | <b>0.024</b> | <b>-0.485</b> | <b>0.022</b> | <b>-0.488</b> | <b>0.021</b> |
| PO <sub>4</sub>                  | -0.243        | 0.276        | -0.287        | 0.196        | -0.321        | 0.146        |
| NO <sub>2</sub> +NO <sub>3</sub> | -0.341        | 0.120        | -0.370        | 0.090        | <b>-0.498</b> | <b>0.018</b> |
| SiO <sub>4</sub>                 | -0.298        | 0.179        | -0.334        | 0.129        | -0.327        | 0.138        |
| Chl <i>a</i> , > 20 µm           | -0.076        | 0.737        | -0.049        | 0.830        | -0.166        | 0.461        |
| Chl <i>a</i> , 2-20 µm           | 0.289         | 0.192        | 0.271         | 0.223        | 0.390         | 0.073        |
| Chl <i>a</i> , < 2 µm            | -0.005        | 0.984        | -0.022        | 0.922        | 0.029         | 0.899        |
| Heterotrophic bacteria           | 0.322         | 0.143        | 0.292         | 0.187        | 0.337         | 0.125        |
| PPEs                             | -0.164        | 0.465        | -0.170        | 0.450        | -0.304        | 0.168        |

**Table S5.** The topological features of co-occurrence networks for pico-sized haptophytes in surface water and SCM layer.

|         | Node | Edge  | Average degree | Clustering coefficient | Average path length | Diameter | Graph density |
|---------|------|-------|----------------|------------------------|---------------------|----------|---------------|
| Whole   | 372  | 28823 | 154.962        | 0.807                  | 1.93                | 6        | 0.418         |
| Surface | 226  | 22536 | 199.434        | 0.964                  | 1.114               | 3        | 0.886         |
| DCM     | 51   | 439   | 17.216         | 0.784                  | 1.991               | 4        | 0.344         |
